# Supplementary material for: Social networks, mobility, and HIV risk among women in the fishing communities of Lake Victoria
Source: BMC Womens Health. 2022 Dec 28;22:555. doi: 10.1186/s12905-022-02144-8 (PMC9798550; doi:10.1186/s12905-022-02144-8)
Supplement: Supplementary file 1 — Additional file 1. Social networks thematic coding matrix. [file 12905_2022_2144_MOESM1_ESM.xlsx]

## Sheet:  social networks data
Social networks thematic coding matrix
Legend:
TZ=Tanzania-MITU
UG1=Uganda-MRC/UVRI & LSHTM
UG2=Uganda-UVRI-IAVI
IDI=In-depth interview
KII=Key informant interview
Site	Data type	Demographic characteristics	The different social networks within the FC		Benefits of social networks		Social networks and associated risks (including HIV risk)		Group Mobility		Any other comments
			Code	Quote	Code	Quote	Code	Quote	Code	Quote
TZ	IDI	30-40 year old female, food vendor	Small hotel workers; these womens are in a group of 5-10 , with age range from 20 to 30 years, they stay connected to each other. These group also engaged themselves in transactional sex.	"They stay connected, contacts are by phone calls and social media. And through friendship networks created, they keep their trade on track".	income opportunities: Their closer association help them to locate places of high fish catch, they meet together and alocate scouts to survey business environement, once survey is done with positive results they moves to the area.	"Hotel workers travel in a group for purposes of protection. They are in the same surroundings to protect against crime and prosecution, and to help one another in the case that one of them is faced with a problem".	HIV risk: They encourage young girls in their communities to drop out from schools and recruit them in their networks, this expand the number of women who have high mobility in their communities and increase HIV transmisisons	There is a guest house close to my hotel. Often times you will hear them forcing each other to have unproteted sex. They will argue for a while and eventually the argument will stop and you will hear noise of people having sex. Showing that they eventually reach an agreement”	Hotel workers move together as a group to places with high fish catch. The areas with high fish yield have large collection of people creating high demand for food and sex. The size of the group moving to a particular island or landing site depend on population of the place of destaination and the number of small hotels available i the area.
TZ	IDI	40-50 year old female, fish processor	Fish procesors;These are women who moves with fishing crews.	"They stay connected with fishermen as they move together to the area with high fish catch"	Protection from violence/access to informatio: Their network help them with security among themselves from bad men or from their employers also simplifies access to infromation about jobs opportunities.	“Fish procesors, are connected to each other in such a way if one finds an opportunity existing somewhere they communicate and invite one another.	HIV risk & marriage breakages: Fish procesors are highly mobile, they may take up to three months before returning to their original communities. Being involved in short and long term mobility expose them to multiple sex patners and marriage break ups.	"Temptation to have extra marital relationships comes with the job. When a woman travels to the island for example away from the husband, it is easy to betray her marriage because she is she meets several men in her line of work and many would want to have sex with her as condition for giving her a job. So if she is not firm it is very easy to betray marrriage. Other reasons for having extra mari…	Fish procesors move in groups together with fishing crews	Asked if there were women who moved in groups, she said that silver fish traders moved in a group now that they loaded their merchandise onto one truck.
TZ	IDI	30-40 year old female, bar worker	Bar workers; these are women who work in bars. This group work in bars serving drinks but they also provide sex for money. Like the rest of the groups they stay connected via social meadia, WhatsApp and through phone calls.	"Women who works in bars stay connected with each other and always share information on employment. When one finds emplyment opportunity will communicate"	Group support: Their network help them to find employment, social security and also they save, donate and lend money to each other through their associations known as Ifogong'o.	"If one of them met with bad costomers, she make effort to know who he is and share the information with others in their network"	Child neglect: Their close association and long term mobility make them to abandon their childrens, this make their childrens to adopt bad morals and they become burden to the societies.	"Those with children abandon them for the long time and this lead children to living without guidance leading them to develop bad morals also become burden to society"	Bar workers moved in groups as they tended to move to the same place
TZ	IDI	30-40 year old female, fish trader	Fish traders:These are women who are engaged in buying and selling of fish. There two categories in this group, first are those who buy fish from fishermen and sell them withing their community, and the second group are those who move in diferent fishing communities to buy fish and travell away from the fishing communities to sell their fish	"They stay connected, contacts are by phone and social media. And through friends that they make, they keep their trade on track".	Access to information on income opportunities: This group stay connected throgh phone,and they pass information to each other on the areas with high fish catch and places with good market for fish	"We move together so as to make each of us safe"	HIV/STI risk: In order to secure fish at good price, they sometimes engage in sexual relation with fishermen in diferent fishing communities. Because they move from one fishing community to another , they sometimes have multiple sexual partners, which is likely to expose themselves in high risk of getting sexual transmited infection including HIV.	"You may finad that a women gets fish from several men and she is mixing them all up. Sometimes when men realise that the woman is getting fish from several men, they sometimes gang up and beat her, That is why such wome do not last in marriage. Another challenge ii the risk of contracting sexually transmited diseases because of sleeping with every man. Such women are the most affected by STI inc…	Fish traders move together to landing sites with high fish output and/or with good fish market
UG2	IDI	30-40 year old female, restaurant owner	sex workers network';They come to the Islands to look for money. once they are informed by their friends that fish is there in plentty, automatically it implies that money is there, so they have wide networks and they don't stay for a long period in the same community. they keep looking for Islands where there's fish. Fishermen's network; women follow fishermen whenever they go because they are s…	"They come to the island because they are told that there is a lot of fish on the island and that means there is money, some spend about three days and then move on to another area once the fish has reduced. That is how it has been ever since way back up to now." Mobility due to seasonal fishing; people especially the women move from this island to another because of the availability of fish in t…	Availability of work/income opportunities; In most cases when women migrate with fishermen following the fish seasons, they are sure of jobs such as sundrying fishing nets.	The fishermen move to look for fish and then the women will follow them because they know they will be available jobs associated with fish wherever they go to such as spreading of fishing nets.	HIV risk: women are now more vulnerable to HIV since most of them cannot get a chance of testing their HIV status with men before having sex. Once a man comes with more money, women just accept sex after all they sleep with many men.	"The informant said that there many challenges people face in mobility that the women who move to different areas face a challenge many men who want to sleep with them but from such men one of them may offer a lot of money and she accepts it to have sex with him. This poses a risk of that woman getting infected with the HIV virus from that man. She adds that the women who stay at home may not get…	Women tend to move due high demands such as taking care of their children which is not the case with men.	"Mobility due to responsibility; the informant said that men can just one day move off the island fleeing from family responsibilities such looking after the children and they go wherever they want to go whereas the women sometimes move due to family responsibilities such as taking their children to school. She added that sometimes these two may meet themselves in some other different area after …
UG2	IDI	20-30 year old female, waitress	political Instabilities; This also in most cases cause people to move to another communities after getting misunderstandings with their opponets. Some mobilities are due to ban on illegal fishing, they keep communiticating from different Islands to findout where ther's less restrictions of illegal fishing. Peer's net work; Some women contact their colleagues at Islands to look for them some emplo…	"The campaigns sometimes become fierce and fights breakout, the jobs too become competitive. That this sometimes makes some people who do not want such chaos to move away from the island to other areas." "That there are those women who disguise the work by doing some other jobs but yet in actual sense they use their bodies in order to earn that extra money, that some women come here without the i…	employment opportunities, these groups keep updating themselves where there's business.	" fishermen move all the time looking for fish in different areas because the fish are always on the move; that one will hear that these fish are in Namisoke or Nsazi Islands. That this prompts the men to go looking for that fish in those areas. That this prompts the women especially the sex workers to follow wherever the men have gone to because those women will only stay in an area where there …	people experience high cost of living for instance, settlement fees, docking fees among others.	"The informant said that people face a challenge of paying money for hiring a place to dock on different islands and landing sites especially for the fishermen who have boats and these areas charge differently which turns out to be expensive since they move from one area to another. That for the people who move to settle in new islands they have to pay registration fee which is expensive to those…	women tend to follow their spouses when they migrate to look for fish, this empowers them in new communities they relocate to comparing with individual basis.	some men leave the island because they are running away from family responsibilities such as taking care of their children and run to other different areas. Whereas the women move because of the family responsibility such as taking their children to school on the mainland or even seeking better medical services. Some women leave the island permanently and go to the mainland and look after her fam…	Other causes of mobility includes: breaking laws from other communities, searching jobs, social visits among others.
UG2	IDI	30-40 year old female, shopkeeper	sex workers network, they keep moving to one place to another in order to look for money. Women are connected to many net works such as bars, lodges among others however all these activities are supported by fishing/fishermen therefore the system of illegal fishing has caused higher mobility rates in fishing communities.	"The informant said that the women move in to look for money in other areas, she gave an example of sex workers who work here but then when they realise that they no longer market or when their clients are few, they then move on to other islands such as Kavenyanja where they are less known. That in those people’s eyes who stay there the women are new and they will get very many customers hence ma…			love for money put women in fishing communities at high risk of acquiring HIV given their needs and other sexually transmitted diseases. Lack of time to go for Couple HIV counselling and testing.	The participant said that the men really yearn for the new women whenever they see them on the island saying that they will be the first to sleep with that woman hence it is such a competition between the men. She added that some of these men the island think that these women have to do sex work yet it may not necessarily be true because some of the women come to look for money by doing other thi…
UG2	IDI	40-50 year old female, fish processor	Peers network ; women move in contact with their friends who are already in different areas after identifying petty jobs for them. Bar attendants network; Restaurant attendant network and Visitor's network.	"She added that overtime there have been social changes on the island because in the past there were no sex workers on the island as it is now because in the past there were few women on the island and that for one woman who would come on the island to make money that she would make a lot of it because men would compete just to have her attention such as giving her free fish. These women later ca…	strengthens social networks	Social visits;" some people leave the island in order to go and visit their families and friends on the mainland. Some other people have built their houses on the mainland and so sometimes they go to say there whenever they feel the need to go. That this also applies to the foreigners such as the Kenyans and the Tanzanians would who leave the island and go to visit their families as well and come…	people are completely relaxed when it comes to HIV prevention, preventive measures are not considered at all but what matters to women is money. Local perceptions which expose them to HIV such as, Thinking that their immunity is stronger because they eat well. loss of live due to lack of access to health facilities in places where they go to. Loss of properties	" most people do not know about the HIV risk and mobility, that most fishermen after selling fish they head straight to the bar and there they meet women buy for them booze and later both go to the lodge and have sex without condoms sometimes hence increasing the risk of HIV. most fishermen have stupid minds because they believe that if they can survive deep waters when they go to fish how then c…	women tend to move in groups while looking for jobs for instance if an Island is baned from fishing, you find that most of women will be forced to look for another Island where there's green pastures for survival.	"Lack of enough jobs for women on the island; the participant said that there were very many women who used to earn a living out of smoking fish and would feed their families as well as educating their children and sending money to their relatives living in different areas. Now that such activity was banned, most women ran out of jobs since it was the most particular activity and left the island …
UG2	IDI	30-40 year old female, casual worker	Fishermen's network; They don't stay in one community for so long, they keep moving depending on fish seasons in different communities and this influence the movement of many people especially women. Sex worker's network; It is on record that sex workers are like fishermen, they dont settle in one place.	Mobility due to sex work; since way back up to date women move more compared to men and most women move because of different reasons. That there are those women who are sex workers, they come pretending to work as hawkers on the island during day during but at night they switch to sex work. fishermen go looking for fishing in distant islands such as Kavenyanja Island in search of fish like the Ni…	They create job opportunities to more especially women who are engaged in different activities.	"women do a number of activities on the island. some of these activities include; barmaids, waitresses, sex workers and these are more, women who sundry silverfish, women who have small vegetable stalls and sell vegetables, women who work in saloons, female primary teachers and some women who operate in drug shops".	negligence of HIV prevention measures. Lack of access to healthy care: most of the islands lack health services which affects people's lives. women being raped in new communities which expose women to HIV acquisition.	"some people on the island think that some women who leave the island go to do sex work elsewhere because they have over stayed in the area and their male client rate has gone down. men mock these women by telling them to go and do their business elsewhere, this therefore forces women to go to other areas where they are less known and men there are highly attracted to them hence making a lot of m…	Loss of jobs is a major factor that leads to group mobility.	Loss of jobs on the island facilitates mobility; the ban of illegal fishing by the fishing authorities as well as the strict fishing rules allowed for one to do fishing such as a specific fishing net size have forced very many people who directly and indirectly benefited from it to move to other areas where there are less strict fishing rules and islands that are less monitored. This includes; sm…	Other challenges associated with mobility mentioned include: loss of friends, break up of relationships and increased domestic violence.
UG2	IDI	30-40 year old female, trader	Bar attendants network; The bar owners keep changing them because the longer they stay in one place the more they lose in business because custmers are always attracted by new faces.	"Bars that is most of the people who stay in fishing communities take alcohol which attracted many people who do this kind of business. It is noted that people who move a lot are bar attendants that is a bar owner can use over 40 attendants in a month because it is these people that attract customers that is every time customers hear that there is a new bar attendant in so an so's bar that is whe…	Job opportunities, women tend to get jobs whenever they migrate to new places because they tend to live contacts with their colleagues so they keep updating each other.	Women like being seen as new people in the community that is in fishing communities so they keep moving from one community to another such that they are new wherever they have gone. Most of these people do not want to say that they are coming from another fishing community so they say they are coming from the mainland. Here new people especially women are liked a lot by men.	Disconnection from health care/ HIV spread: Poor drug adherence and failure to adhere to positive living which exposes the entire community at risk of acquiring HIV. Most people come with expectations that is the people who bring them to these communities tell them that there is a lot of money therefore they come expecting to make a lot of money which may not be the case and such people end up in…	It is noted that people who are having HIV that move a lot because they want to spread it elsewhere. When they are known that they are HIV positive they go to another community where they are not known. Some come after they have lost their spouses and when they tell people the truth they simply say HIV didn’t come for trees. They add that they will still die. Not all that die, die of HIV/AIDS. Mo…	fishermen's network; they always move in groups especially when they are looking for fish.	People move depending on the nature of their work that is there are people who move a lot and this is because of the nature of their work which is dependent on the fish seasons for example the hawkers, traders among others. These people make more money when the fish season is on. Fishermen have a tendency of saying that the lake will not shift so anytime they can go back and catch fish so when th…	failure to have permanent marriages on islands also contributes to high mobilities, 18-35 yrs is the age bracket of women who are highly mobile.
UG2	IDI	30-40 year old female, salon attendant	Bar attendants network; This group moves a lot because most of bar attendants are sex workers therefore they move to look for new customers. Boats owner's network; Whenever they hear that there's a good fish catch in a certain community, they just move with their employees. Network of women dealing in food stuffs. Hawkers's network;	Bar attendants are some of the people that move a lot in this community because for them when they come in the community they attract many people (men) to come in that bars but when the customers get used to them they stop coming so they look for a place where there are new people so in most cases their bosses tell them to leave such that bring in new ones. They can stay in a place like for a wee…	women who are not married find it easier to move from one place to another since they have no responsibilities that keep them in one place.	Women that are not married move more because they do not have responsibilities that will keep them in one place all they have to do is to look for where there is money. They look for money in such a way that they move from place to place looking for where they will feel like they are getting what they expect. They are capable of doing anything for money a part the kind of work that requires hard …	Love for quick money among women has put their lives at higher risk of acquiring HIV/AIDS especially sex worker's network. Unwanted pregnancies are also a challenge to women who are highly mobile. Increased cases of murder to sex workers. Increased cases of women who are being raped. Conflicts within the community where these women are migrated and domestic violence.	Women want quick money that is they are impatient so they always move from place to place looking for where they can make fast money. Secondly there are certain jobs that women disguise so they do look for easier things and these are temporary most times like sorting fishing net, when the fishermen move it means they have to move with them. "Most women when they come back they say they got childr…	women are usually connected by their friends from different communities to go for business especially in areas where its season for fish.	Before sex workers commonly known as (“ba neeko”) were very many that is why they would come in big numbers but now they are few due to the reduced income flow. They had very many customers because the community had very many people (men) and these had money to spend on sex workers but of recent some go for sex on credit and some of these do not even pay which was not the case before.	Groups of people who are highly mobile include: Bar attendants, hawkers, sex workers and boats owners. "Bar attendants are some of the people that move a lot in this community because for them when they come in the community they attract many people (men) to come in that bars but when the customers get used to them they stop coming so they look for a place where there are new people so in most ca…
UG2	IDI	20-30 year old, female sex worker/ bar attendant	Bar owners networks; Bar owners have a tendancy of bring in different people to come as bar attendants. These come from different places and they are changed every after a short while. When they come they inform others about the place where they are which attracts others to come. sex workers' network; there are people that keep informing them about the seasons of fish in the different communities…	Bar attendants are changed frequently that is, when you go to a bar you find new faces almost on a daily basis. Bar owners use this technique to attract customers. We the sex workers usually come when we hear that the fish catch is good and money inflow is good. When the season is over we move to another place where there is money. We are money makers.	These networks share information which enables others to know what is happening in other places Bars have created a condusive environment for work that is they are open all the time which has enabled different social groups like the sex workers to work throughtout	Good network system among the people that is when people leave they leave their friends with their contacts such that they keep updating themselves about the situation wherever they are. When the fish season is good where on is they alert their colleagues who later join them. Liberty in fishing communities that is there are things that are done here but they cannot be done at the mainland for exa…	For the case of sex workers, they are after making money that is they offer sex without protective measure so as to get more money which puts both the sex workers and the customer as well as the entire community at the risk of acquiring HIV some people are forced into sex because they do not have where to sleep reason being they move in big numbers yet the places where they go have few accomodati…	HIV infection that is most people do not mind about HIV that is they are not very worried about it all they think about is money. I am HIV positive but I am looking good be it you, you cannot know it is because I have told and I don’t think I am going to die because of AIDS so many people are at a risk of acquiring it since they do not take preventive measures so serious. There are customer that …	sex workers move in groups since they move in the same season(Fish season) in the same destination for the same purpose Bar attendants move in groups that is their friends call them in case there is need for them. This is brought about by the bar owners who change attendants frequently. Hawkers these also come in groups during seasons when the fish catch is good cause that is when people have mon…	We the sex workers usually come when we hear that the fish catch is good and money inflow is good. When the season is over we move to another place where there is money. We are money makers. Bar attendants are changed frequently that is, when you go to a bar you find new faces almost on a daily basis.
UG2	IDI	30-40 year old female, shop owner	Fishermen's network: These were the initial inhabitants who attracted other people to come in the community. It is these fishermen that attracted women to come since they needed them to help out in certain services like cooking for them food. sex network; There are people that keep moving because they want to meet their sex partners that are in different communities. they do this because they wan…	Initially this community had more men since it is men that carry out the real fishing but women came in later when the fishing business boosted and the men that were doing it needed places where to eat from as well as relax which attracted those that started restaurant, bars and other businesses. Most women in this community have more than one partner and some of these partners do not stay in the…	Reduction on domestic violence in a way that some people prefer to have extra marital affairs out side the community. This way their spouses never get to know in most cases There are people that get married when they come for entertainment	Women are sex workers in nature that is most of the women in fishing communities are sex workers in a way that they have more than one man of which most of these are there to sustain them that is they give them material things in exchange for love. These women usually have men in different communities for fear when they are in the same community it can cause havoc that is separation amongst the m…	Many are at a risk of acquiring HIV and other STIs since they have uprotected sex with people whose HIV status they do not know. Due to harsh conditions, there are people that fall out of business where they have gone due to competition and other factors. Some people's belongings are stolen which makes them leave since they do not want to stay in a place where their items are going to be stolen.	There those that acquire HIV and other STIS from where they have gone reason being when they go wherever they have gone they usually get attracted to the people they find there and when they happen to show both interests the next thing is having unprotected.Most times they think of testing after having unprotected and the testing is done to confirm whether they have acquired the virus so not to p…
UG2	IDI	30-40 year old female, bar owner	Fishermen's network: people are moving from one place to another because of fish seasons in different communities. Business women's social network; there are women that carry out businesses like shops attendants, these do other businesses like sex work which they do when they move to other communities claiming that they have gone to buynew stock for their shops. Boat owner's network; These attrac…	Most people in fishing communities move because they are looking for money so they keep going where they hear people say that there is money for example there are people in this community that went to Ziru because they heard that people there were getting a lot of money so they decided to go there and now slowly by slowly some are coming back because the season for silver fish has started. Women …			Rape; Many people have been raped because thay have been lied to by the people who invited them to the coming. This has put many at a risk of acquiring HIV. There are people that are killed because they are being offered as sacrifices by those who invited them. Poor drug adherence because there are no facilities that give ARVs and the diatnce to where they can get the drugs is long. there are als…	There are very many people that have acquired HIV in different ways that is there are those that are raped by the people that have called them. One can called you and tell you that there is work available for you all you have to do is to go expecting to start work the following day. They tell u they already have a place here you are going to sleep so when these people get there they are shown whe…	Boat owners move along with their workers as well as other boat owners when they are going to communities where the fish season is on	Boat owners move a lot that is those people that are dealing in the silver fish fishing. They move with their worker to where they hear that the silver fish catch is good in that community. They can leave the community that is for something like three months then they come back. By the time they return the fish season is also on in this community. These also influence other people to go along wit…	There are things that women cannot ask from their husbands so they have to find a way of getting money so as to get these things for example it is hard for a women to ask her husband for inner wear.
UG2	IDI	40-50 year old female, market vendor	Fishermen's network; These come back with other people from the places where they go fishing in the different seasons. Peer's network: These invited their friends and other people tocome and make quick money. women searching for men's network: These are people who come looking for men to marry them because they have heard that men in fishing communities love women and that they give out money any…	When people were many they would not stay here every time that is they would move (“kulinduka”) and go to other communities where they heard that there was good fish catch. When the season is over they would come back since it would have started here. When they were coming back they would come back with other people that are new in the community that is some would get wives from there and comebac…	Most of the people that are called to these communities are called to get employed or make money. People get quick money that is they can get money in a very short time	Availability of work that is there are very many jobs here that people can do. These kinds of jobs do not require one to have academic documents to get them for example one does not need to have gone to school to work as a bar attendant, dobbi, to sort fish nets etc. most of the jobs here are learnt while working with someone who has been doing it. There are very many people that have come to thi…	Increased new HIV infections becausr there are women that are having sex with more than one man yet men do not want to use condoms. Some woemn are raped. Sexual harrashment in a way that many are asked for sex so as to get what they want. Insecurity by community leaders	There are women that have acquired HIV because they are reckless with their lives like those that go looking for men to marry them and when they get one they desire to get more and they get another so by the end they have had more than 10 men of which men in fishing communities do not want to use condoms because they do not fear HIV. There those that are just raped like a friend of mine who was r…			Family responsibilities were left to women that is most of the work that is related to taking care of the family was left to women. Most men say that after role women want equality so let them do all the work inclusive of what men are supposed to do. Most of the work that women do in fishing communities depends on the availability of fish that is why they have to go where they have heard that the…
UG2	IDI	20-30 year old female, boat owner	Hawkers' network; these keep notifying their fellow hawkers about the avilability of bysiness in a certain community that is why they never settle in one place but they going where they have been told that business is good. Bar owner's network: these keep changing bar attendants so as to get more customers or maintain their customers. Boat owner's net work; These move a long with their worker. Vi…	there are hawker, these keep coming that is when some leave others come in these never stay for long, they can come like for a week or less then leave and come back later after like a month. Bar owners also change them because they knew that new attendants attract more customers therefore they get a way of sending them away and get new ones. boat owners determine whether their employees move or n…	Bar attendants update themselves of places with more more. When they get to know of a place where there is more money, they leave wherever they have been and go where there is money.	Bar attendants move a lot that is they want to get first money so as they are working somewhere they are also looking out for places that are having more money. When they get to know that bars in Nsazi are working more and people there are getting more money they leave and go to Nsazi.	Unmet expectations resulting to losses. Unwanted marriages; women end up getting married when it is not their intention reason being that they need someone to support them. Death due to HIV infection. some people can not access medical care and services	People incur losses for example we might go to a fishing community because we have heard that the fish catch is good so we put in our fuel to go to that place, facilitate the people we move with but on reaching there you find that you have not caught as much fish as you expected. This applies to people with other businesses who may invest in their capital to start businesses where they have gone …	Fishermen's network; these tend to move as a group to places where they hear that the fish season is good	People who deal in silver fish fishing move a lot that is they can move like twice a week since the silver fish is caught basing on the moon that is when the moon is there then the catch is not good therefore we decide to go to communities where it is dark. The season is usually 2 week of the month may be dark nights then the following 2 with the moon so we keep looking for places that are having…	Women are more responsible than men. Men are responsible but they are not as responsible as women which makes women to move a lot so as to get what can sustain their families t those that have them while those that do not have at least they take care of their relatives. Most times men become organised when they have wives or women taking care of them that is why they say behind every successful m…
UG2	IDI	20-30 year old female sex worker	Restaurant attendant's network: these leave anytime because they do not want to be bossed around by their bosses	Bar and restaurant attendants behave the same way that is they do not stay for long reason being that most of the people that do this kind of work usually have personal issues that they need to resolve so they do this kind of work while looking for solutions to their issues. Being that most of the people that do this work are young girls they find their bosses old fashioned so they do not want to…	The cost of living is low as comapred to other places so expenditure is not much.	The cost of living in fishing communities is not as high as that at the main land for example most of the rentals here go for 20,000 shillings per month and these are the nice looking ones while at the main land if there is a rental at that amount it is one of the worst structures.	Deaths while traveling on water. HIV; there are people that acquire HIV because they have unprotected sex so as to get more money.	There are many accidents that occur and when they happen most people die that is they drown. People in this community fear drowning more as compared to HIV. They say that HIV/AIDS does not kill but it is very hard for one to survive when they drown. There are people that acquire HIV that is when they get where they are going, they get people they get interest in or people that they attract so whe…
UG2	IDI	20-30 year old female, bar owner	sex worker's network, sex workers move a lot because the moment they over stay in one place means loss of customers so they keep moving to different comunities to look for market. Boat owner's network, this group move alot because they follow fish seasons, they don't settle in one place and in most cases they influence other people to follow them since most of bussinesses in fishing communities a…	Sex workers move a lot because their customers reduce when they stay for long so they leave after very short period and go elsewhere where they will also be seen as new people. People here like new people that they go to those that have just come to the community therefore the old ones lose market. Boat owners move a lot that is they leave and go where they hear that the fish catch is good. There…	Job/income opportunities, In most cases people come to fishing communities to find what to do, therefore peer's network help them a lot to connect themselves on various jobs.	I came to this community through my mother that is she invited me to come and visit her. She had already brought my sister and she was staying here so when I came my sister told me to stay behind and make money since business was good here then. The reason why I came to this community is to work that is make money.	Risk of HIV acquisition, People in fishing communities fear drowning than HIV. Transport challenges which sometimes causes death/drowning due to poor state the public boats are in.Poor hygiene i.e. most communities do not have toillets completely, people go to bushes thats why diseases are many among people. Lack of access to health facilities, people go to small clinics whereby some health worke…	There are very few challenges faced that I see. Before people were scared of HIV but they no longer fear for they got to know that it does not kill. Actually very few people we have heard that they have died of AIDS but there are very many that we have heard that they drowned and died. In the past 3 weeks we have had 2 drown and die. Transport is a challenge here that is it is very risky to trave…	Fishermen's network; these tend to move as a group to places where they hear that the fish season is good.	The fish season, people go where they hear that the fish season is on since it is fish that determines other activities in a way that when the season is on very many people come in the community and when they come that means that other businesses like bars, restaurants, salons will have more customers thus making more money than before that is why people move and go where the fish season is on. E…	Women are more responsible than men, most of the family work is done by women like taking children to school, visiting them on the visitation days and picking them form school. When it comes to responsibilities like picking items from the main land, shopping, men leave it to women so you find that women move more than men.
UG2	IDI	30-40 year old female, trader	sex workers network'; sex workers had connections aimed towards the same goal. They recruited women into the sexwork network and the new recruits in turn recruit others. they even formed groups and each group had a senior person. These groups moved together into an area and they followed the same direction.	"They are connected by the same goal; contacts are by phone and social media. And through friends that they make, they keep their trade on track. To be connected, these people make sure they make as many friends as possible in the areas they operate from and keep in touch”	Group support: the networks offered support in that had group protection and tended to live in close promixity when they got into a place. There is also sharing of information amongst network members in case of good business prospects.	"The sex workers travel in a group for purposes of protection. They hire in the same surroundings to protect against crime and prosecution, and to help one another in the case that one of them is faced with a problem". “The sex workers especially, they connect in such a way that they easily network if one finds an opportunity existing somewhere and also enroll new people into the sex work network.	HIV risk: for the case of sex workers, young women envy those sex workers who are successful because they feed and dress well, have nice things. This tempts young women to also join and this exposes them to HIV risk.	"The young women look at those who have been sex workers, and envy them. Some of them have made it and they lead a good life, have property and the rest. So due to lack of employment, they are talked to and try out in the trade".	Protection: Sex workers moved in groups as they tended to move to the same destination	"The sex workers travel in a group for purposes of protection. They hire in the same surroundings to protect against crime and prosecution, and to help one another in the case that one of them is faced with a problem. They network a lot and they mobilise themselves using the phones, the social media currently, and they are always aware of what their group members are up to".
UG1	KII	40-50 year old male, bar owner	sex workers network, bar workers/owners network: There also people in this place who move on call especially sex workers. When they are coming to this place, they come in a big number, they distribute themselves to different places, and when one sees that there is good business where they are, they will call on their friends to join them. Therefore, they are always updating each other on what is …	there are women and girls who help me in the bar and on a daily basis, I have between 20 and 25 women working in the bar. These women come from different places like Kyazanga, Kooki, Mbarara, Bukomansimbi, and Mukono. I probed to know he manages to pay them and he said my work is very simple; I get for them where to sleep, lunch and supper and give them 2000 per day. However, in turn, you find th…	Information sharing on income opportunities	they are always updating each other on what is happening in places where they are. This triggers them to move frequently because everybody would like to go where there is good business. For example, if there is a lot of mukene catch or during the period of darkness, we get many sex workers and bar workers because that is the time when there is a lot of money.	HIV risk	when they come, we tell them that there is money out there but all you have to do is to be creative and you will get money from the men. So when the men come to drink, they make sure that they entertain them and if a man wants to go with one of the girls, he will pay the agreed amount at the counter and then take the girl.	sex workers moved in group when coming into the community	There also people in this place who move on call especially sex workers. When they are coming to this place, they come in a big number, they distribute themselves to different places, and when one sees that there is good business where they are, they will call on their friends to join them.	Phone as mode of communication: Phones are a very powerful weapon the women use in their work. Somebody can call her from Kasensero and she will go right away. So if there were no phones, she would not have known what is happening in other places and this would have minimized mobility.
UG1	IDI	30-40 year old female, trader	sex workers network'; sex workers had connections aimed towards the same goal. They recruited women into the sexwork network and the new recruits in turn recruit others. they even formed groups and each group had a senior person. These groups moved together into an area and they followed the same direction.	"They are connected by the same goal; contacts are by phone and social media. And through friends that they make, they keep their trade on track. To be connected, these people make sure they make as many friends as possible in the areas they operate from and keep in touch”	the networks offered support in that had group protection and tended to live in close promixity when they got into a place. There is also sharing of information amongst network members in case of good business prospects.	"The sex workers travel in a group for purposes of protection. They hire in the same surroundings to protect against crime and prosecution, and to help one another in the case that one of them is faced with a problem". “The sex workers especially, they connect in such a way that they easily network if one finds an opportunity existing somewhere and also enroll new people into the sex work network.	for the case of sex workers, young women envy those sex workers who are successful because they feed and dress well, have nice things. This tempts young women to also join and this exposes them to HIV risk.	"The young women look at those who have been sex workers, and envy them. Some of them have made it and they lead a good life, have property and the rest. So due to lack of employment, they are talked to and try out in the trade". Some people die from where they go especially those who go to the islands. They reach there and the men want to use them without even paying them as agreed. So some are …	Sex workers moved in groups as they tended to move to the same destination	"The sex workers travel in a group for purposes of protection. They hire in the same surroundings to protect against crime and prosecution, and to help one another in the case that one of them is faced with a problem. They network a lot and they mobilise themselves using the phones, the social media currently, and they are always aware of what their group members are up to". The single women also…
UG1	KII	40-50 year old male, boat loader	Sex workers network: this was reported to have contacts both in the fishing communities and on the mainland and these were reported to increase mobility Women to family networs: whereby women move to visit their partners. sex workers-to- fishermen	For example, the sex workers have a network of contacts in the different fishing communities on the main land and in the fishing communities. They move depending on what information their network has availed to them. So this has somewhat increased on the mobility of some of the people. Sex workers are usually informed through their connections of where there is money and they move quickly to thos…	information sharing; which in turned was reported to ease flow of work	it has eased travelling by people knowing well in advance what they are aiming at when they travel.	mobility related risk e.g. thefts, death. sexual exploitation/violence	They move depending on what information their network has availed to them. So this has somewhat increased on the mobility of some of the people. Some of the women, in being so mobile from one place to the other, are killed in the process. They are killed by their husbands and others by the robbers who want to take money and other possessions from them. During travelling, some are taken to places …	Women peers, especially the single women moved in groups for work. The single women also move a lot, encouraged by their friends to go and look for money by doing many odd jobs in the islands. These usually move in a group for protection.	I was told that they can even physically fight the adamant ones and cause body injuries, so that’s why these sex workers prefer to move in groups for protection purposes.	women also got information from traders, boat operators including boat loader and fishermen of where business was good. Among other challenges that they faced, there was the issue of competition for sexual clients which at times led fights amongst the sex workers and thefts from sexual clients or fellow sex workers as well as failure to secure accomodation in the places they moved to or evening m…
UG1	KII	30-40 year old female, restaurant worker	middlemen-to-bar/restaurant workers	The business women were also human traffickers; because they went deep in the villages, convince young unemployed girls that there is money in the islands. They bring underage girls through these landing sites to the islands, and they charge the bar owners to whom these girls are given or are introduced to sex work business. The fishermen prefer to engage in sex with young girls and those bars th…	easy means of communication/information sharing	According to what I have just said, it greatly increased on the mobility of the women. It used to take long for information to filter through about the abundance of money in the islands, but due to the availability of communication, the islands were opened up. And that’s why there is a lot of competition for all resources. There used to be a few sex workers and they could make a lot of money, but…	HIV risk, violence and loss of money/property	During the rainy seasons, some of the sex workers drink very much and as they travel, their money is taken away when they are drunk, by those with whom they engage in sex with at night, or the thieves who exploit the opportunity when they are drunk. This could keep them stranded in some places until they are able to make enough money to continue to other places. Some sex workers connive with men,…	Sex workers are known to move in groups on group decision	The youthful sex workers are often seen to move in groups of three to five, and they have a linkage that they are either coming from the same place or have met on several occasions and have a tight connection when planning to move to the islands, they meet somewhere to move together. This grouped movements are common in people of similar social backgrounds and seek a united decision in all they d…
UG1	IDI	30-40 year old female, housewife	Women peers networks & sex workers' network	They have helped me to solve some of the problems that I have had because of the social coordinates that I have made. These include women groups formed to help us in times of need like ‘’Munno mukabi’’ in luganda, translated to mean “A Friend in Need” self-help groups. These groups help when like you lose a person to death.Some groups have helped us to save and to borrow in order to meet our fina…	Social & financial support	They have helped me to solve some of the problems that I have had because of the social coordinates that I have made. These include women groups formed to help us in times of need like ‘’Munno mukabi’’ in luganda, translated to mean “A Friend in Need” self-help groups. These groups help when like you lose a person to death.Some groups have helped us to save and to borrow in order to meet our fina…	Violence & sexual risk	In some of the cases, it has led people into dealings which are not beneficial to them, like some women have been taken to the islands, having been convinced that everything is good, only to find that there are more problems than the places they left. Because not enough research about what they are intending to do was done. They were misled by their peers. In other cases, women are convinced to c…	women peers move together in case of social obligations like funerals, weddings, leisure, etc. Bar workers moved in groups in search of work	This kind of movement usually comes when you are going to attend burials of the dead and this happens because the women prefer to move together. They could mobilise themselves by contacting one another and when they move together, they can easily negotiate for cheaper transport, and when also they move in a group, they are secure not to be disturbed by men. The bar attendants, they also move from…
UG1	IDI	20-30 year old female, restaurant owner	Women peers networks & family networks	People come to the islands through the connections of peers, relatives who are already living in these areas and some are brought to work by others. If you have a relative, like in my case, I had a relative, my aunt who had a restaurant in Lambu. I came with one of my young sisters because we also stayed together in Lujaabwa, the other one is my cousin, she left her marriage because of problems a…	Social support and group protection	Some have friends they regard as their role models. They are not easily found in the fishing communities but they are there. So, some of us utilised them and we are where we are because of them. They directed us on what to do and whenever there are problems we consult them. One of them stays in Kyazanga, she is not my relative but only saw how I conducted myself and took it from there. I go to vi…	HIV risk, loss of property, sicknesses and lack of access to health care as well as accidents	Many women are getting infected with HIV because, they move from one place to the other and men take advantage of them because they are still new to the area. Some lose their property in the course of moving from one place to the other through being stolen, being spoilt, as its being packed and moved. Accidents and robberies are common especially when moving into areas the person is not familiar …	sex works and traders were reported to move in groups for purposes of group protection	Especially the bar maids shift in groups from one place to the next. These are connected through friendships they gain as they work in the different bars. One gets the other from one bar to the other. So when one goes to certain island, the friends also follow, at first to test the situation. They can tell the bar owner that they have gone back home, but instead have moved to join friends and try…
UG1	IDI	20-30 year old female, lodge attendant	Women peers network, sex workers, bar & restaurant attendants' networks, women traders networks	At other times, the peer groups might force someone to move on to another place having taken the advice given by their peers. Women have friends, and are there for the different purposes. It depends on what the need is then a group of those friends can be contacted. If its entertainment, a certain group of friends is contacted. If it’s to do with family issues, then the relatives and the few inne…	easy communication and access to information	With the aid of phones, we talk with friends anytime, to know what’s happening elsewhere. It has helped us to keep in contact with our families, and it has helped us to open up opportunities, more especially on the business side. You keep in contact with your customers when you have their contacts and when they have yours.	bad imagine to the group	If it’s for the youth girls, they are regarded as prostitutes. If they are youth boys, they regard them as thieves. If this is taken as people think, it might land some of these people in trouble.	women peers and traders move in groups	There are those who move from one place to the other because they want to attend a function on the mainland, for example the youth would move in a group to attend a musical function in Masaka town or go to a night club. If one moves alone, she might not enjoy it but in a group, they have even memories to talk about. The women in most cases move together to attend concerts in different places, the…	There are several reasons as to why women are mobile. They include family issues and to attend burials, to take children back to schools especially those who are in boarding schools, and even the others who attend day schools on the mainland, because they don’t want them to grow up on the landing sites. The women are the ones who usually represent their husbands in many functions like funeral rit…
